# Supplementary material for: Selective synthesis of WO3and W18O49nanostructures: ligand-free pH-dependent morphology-controlled self-assembly of hierarchical architectures from 1D nanostructure and sunlight-driven photocatalytic degradation
Source: Royal Society of Chemistry journal article supplement (doi:10.1039/c6ce02518h), 2017-01-01
Supplement: c6ce02518h1.pdf [file c6ce02518h1.pdf]

## Supporting Information

### Selective Synthesis of $\text{WO}_3$ and $\text{W}_{18}\text{O}_{49}$ Nanostructures: Ligand-free pH-Dependent Morphology Controlled Self-assembly of Hierarchical Architecture from 1D Nanostructure and Sunlight-driven Photocatalytic Degradation

Y. M. Shirke and S. Porel-Mukherjee

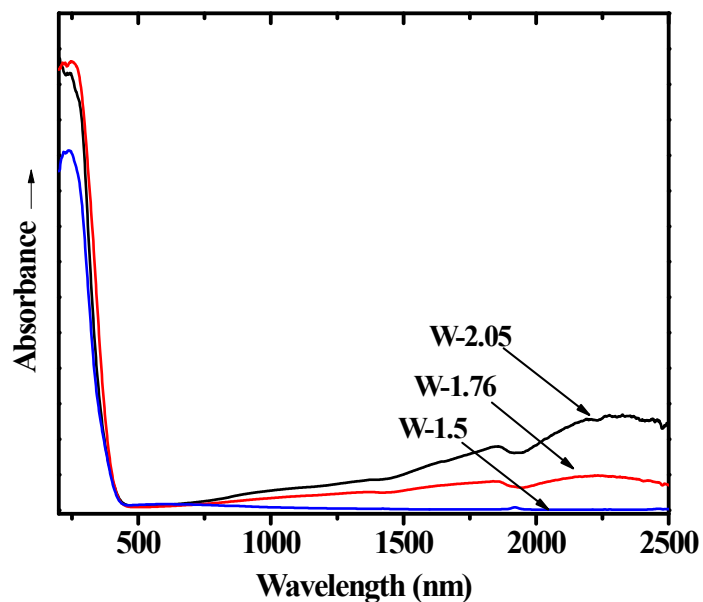

**Fig. S1.** UV-VIS-NIR profile comparison between products W-1.5, W-1.76 & W-2.05 and W-2.05 showing an absorption tail in the NIR region that may arise from the presence of oxygen vacancy.

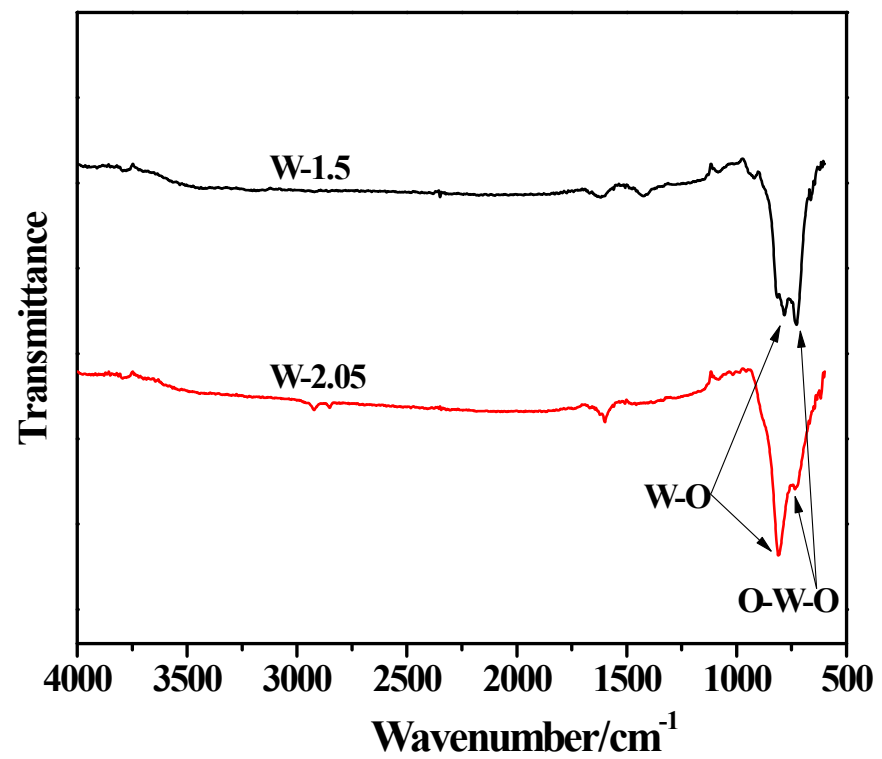

**Fig. S2.** FTIR spectrum of the as-prepared W-1.5 and W-2.05.

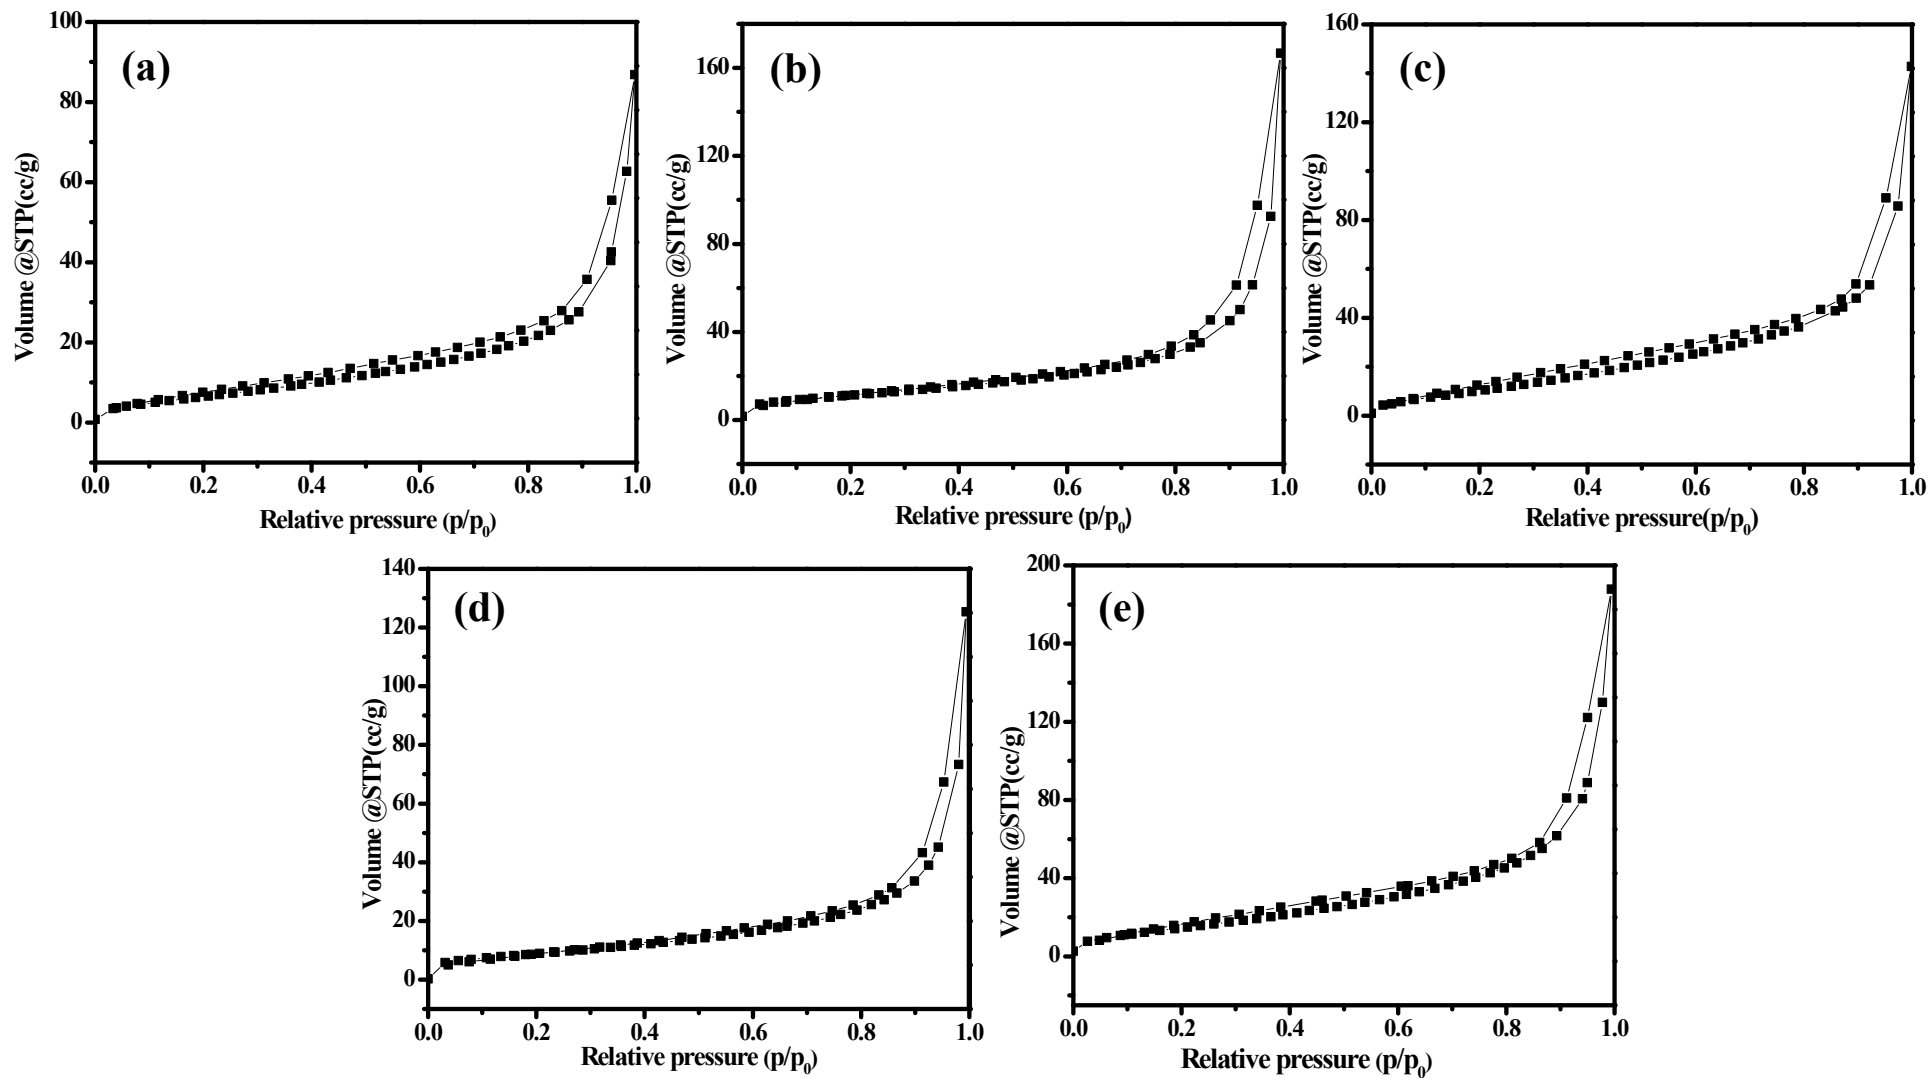

Fig. S3. N<sub>2</sub> adsorption/desorption isotherms for (a) W-0.95, (b) W-1.5, (c) W-1.76, (d) W-2.05 and (e) W-2.35.

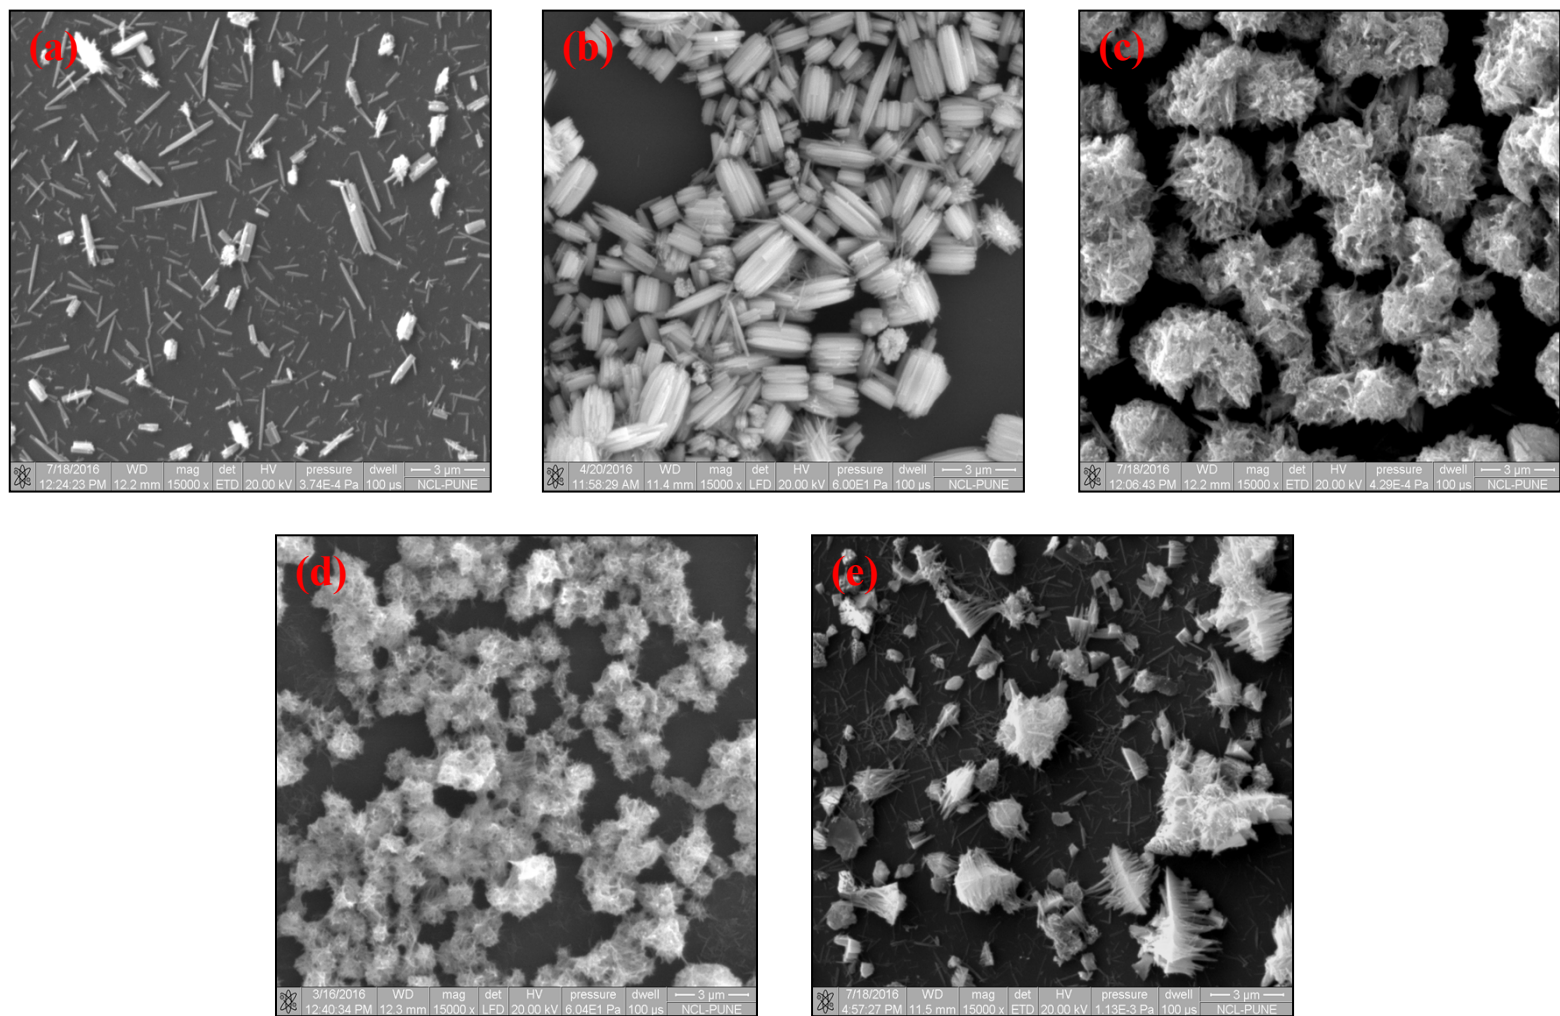

**Fig. S4.** SEM images of the products (a) W-0.95, (b) W-1.5, (c) W-1.76, (d) W-2.05 and (e) W-2.35. Scale bar = 3 μm

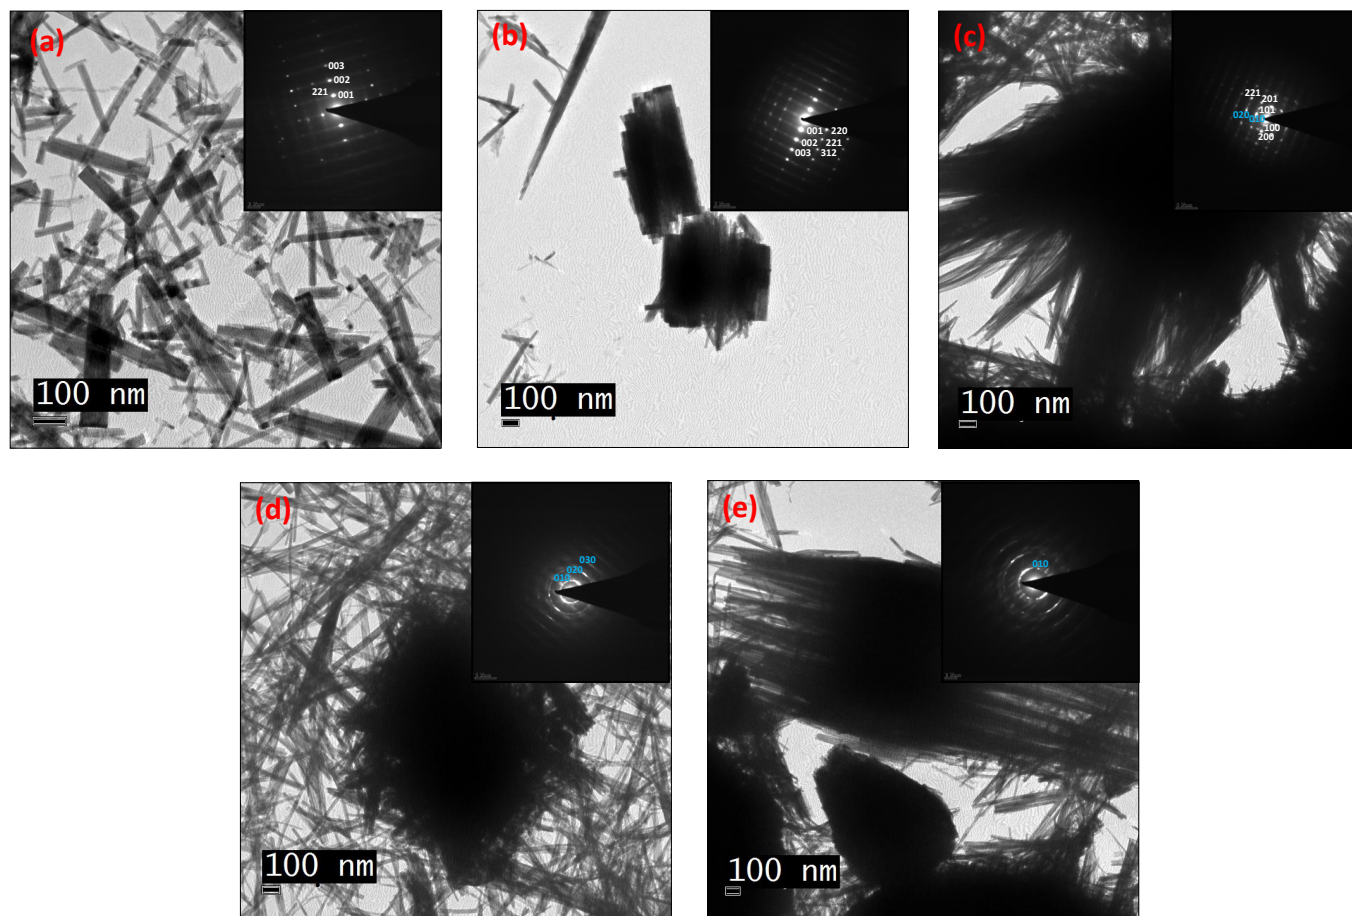

**Fig. S5.** TEM images and the corresponding ED pattern (inset) of the products (a) W-0.95, (b) W-1.5, (c) W-1.76, (d) W-2.05 and (e) W-2.35; with reference  $WO_3$  ( $hkl = \text{white colour}$ ) and  $W_{18}O_{49}$  ( $hkl = \text{blue colour}$ ).

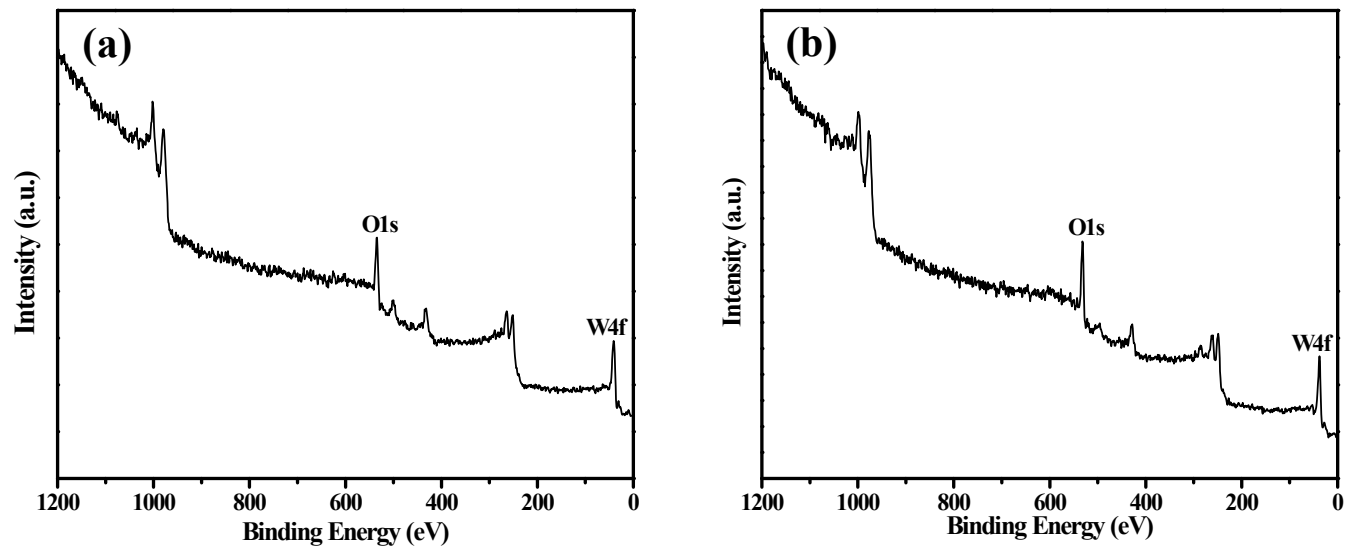

**Fig. S6.** Full range XPS spectra of (a) W-1.5 and (b) W-2.05

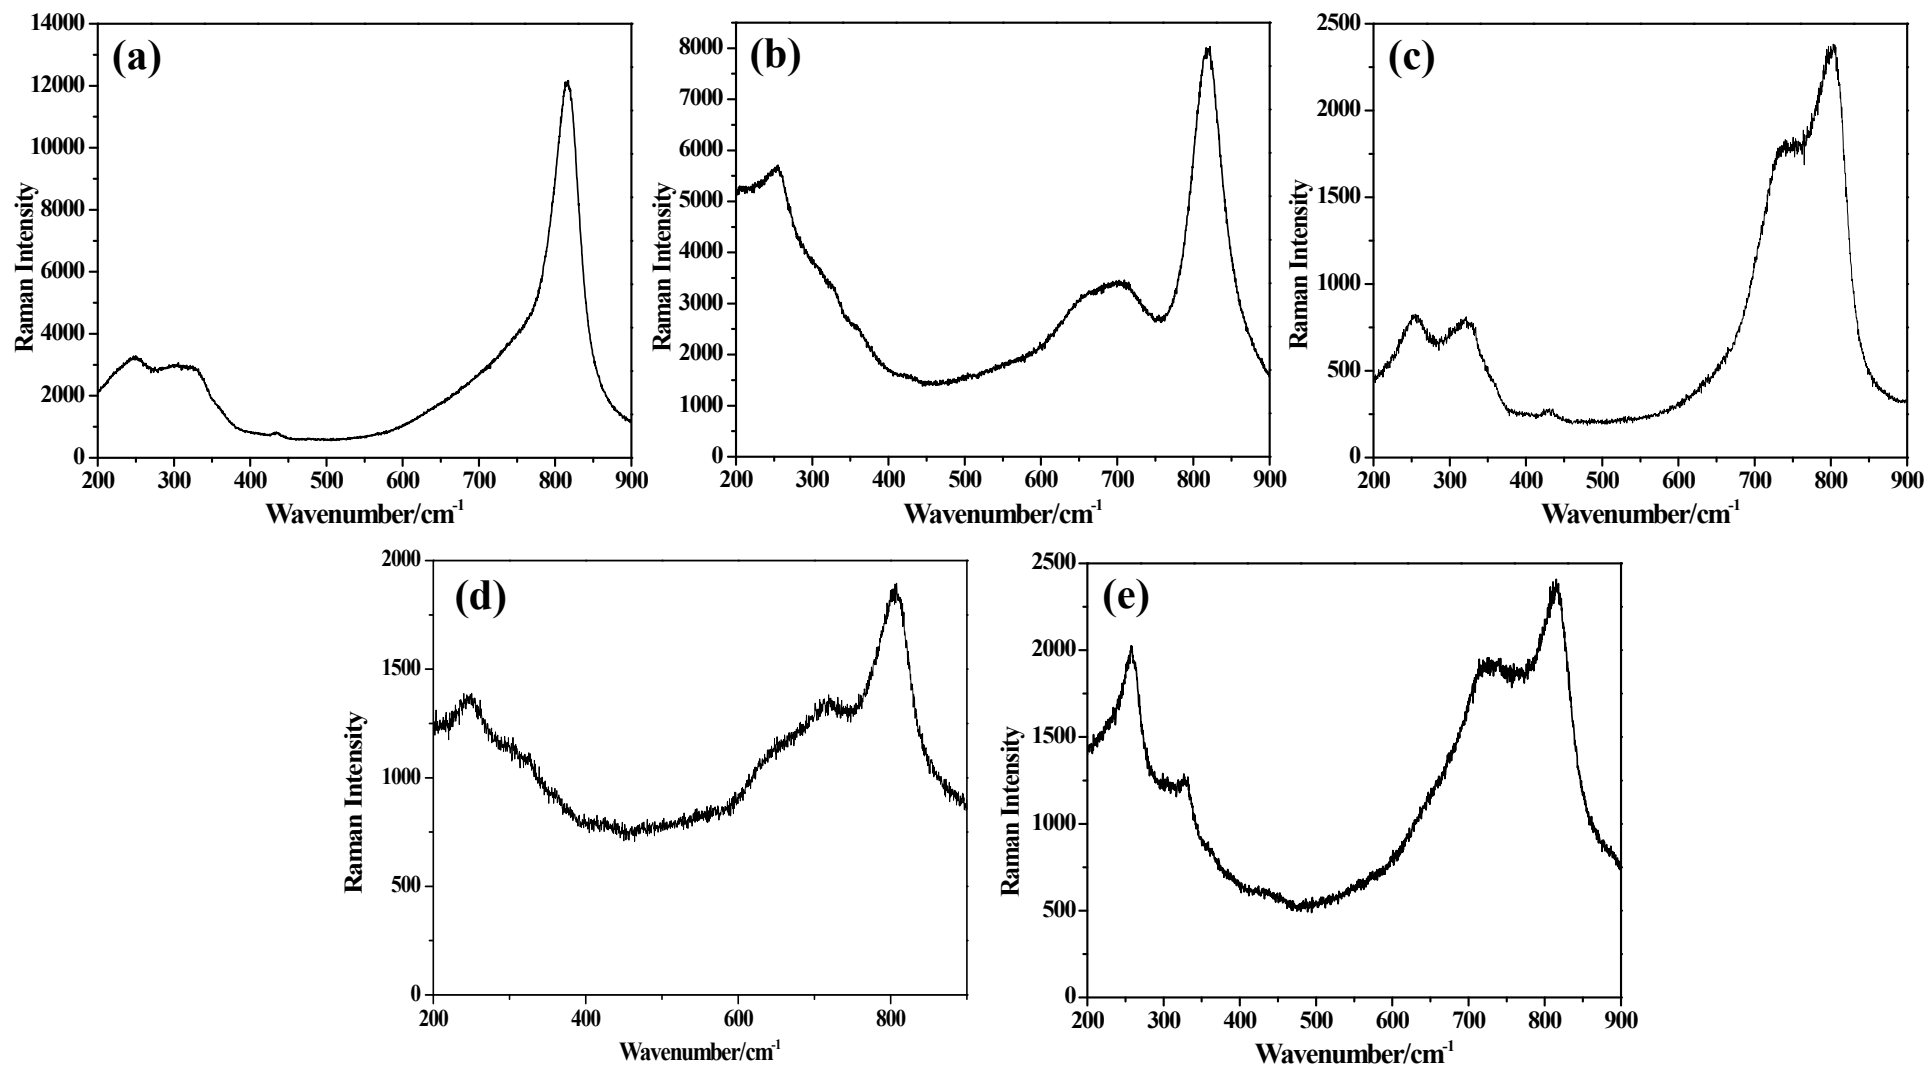

**Fig. S7.** Raman spectra obtained at laser power 20 mW for the products (a) W-0.95, (b) W-1.5, (c) W-1.76, (d) W-2.05 and (e) W-2.35.

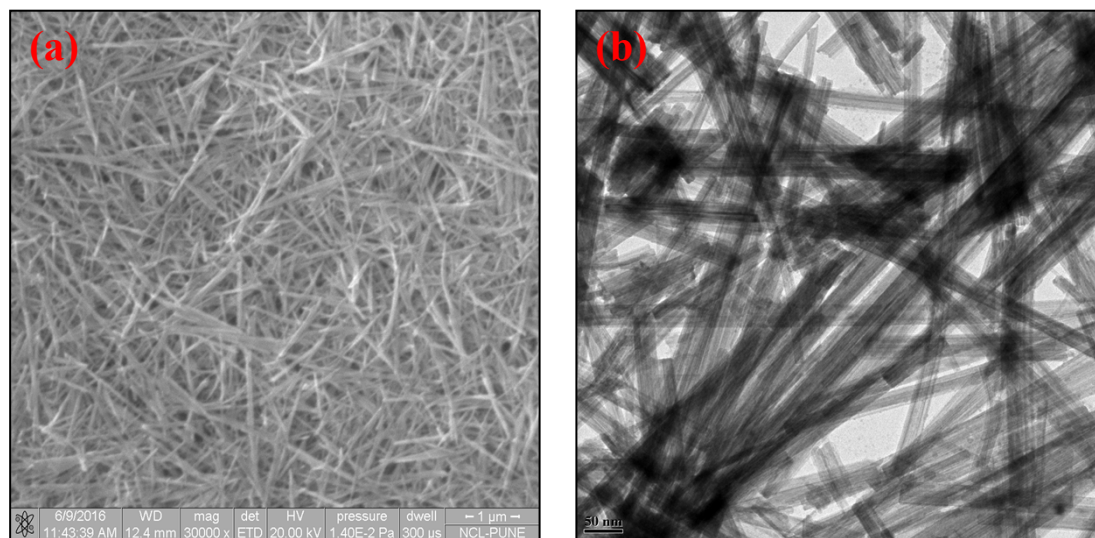

**Fig. S8.** (a) SEM and (b) TEM image of product W-2.35 disassembled by aqueous ultrasonication under a long treatment time.



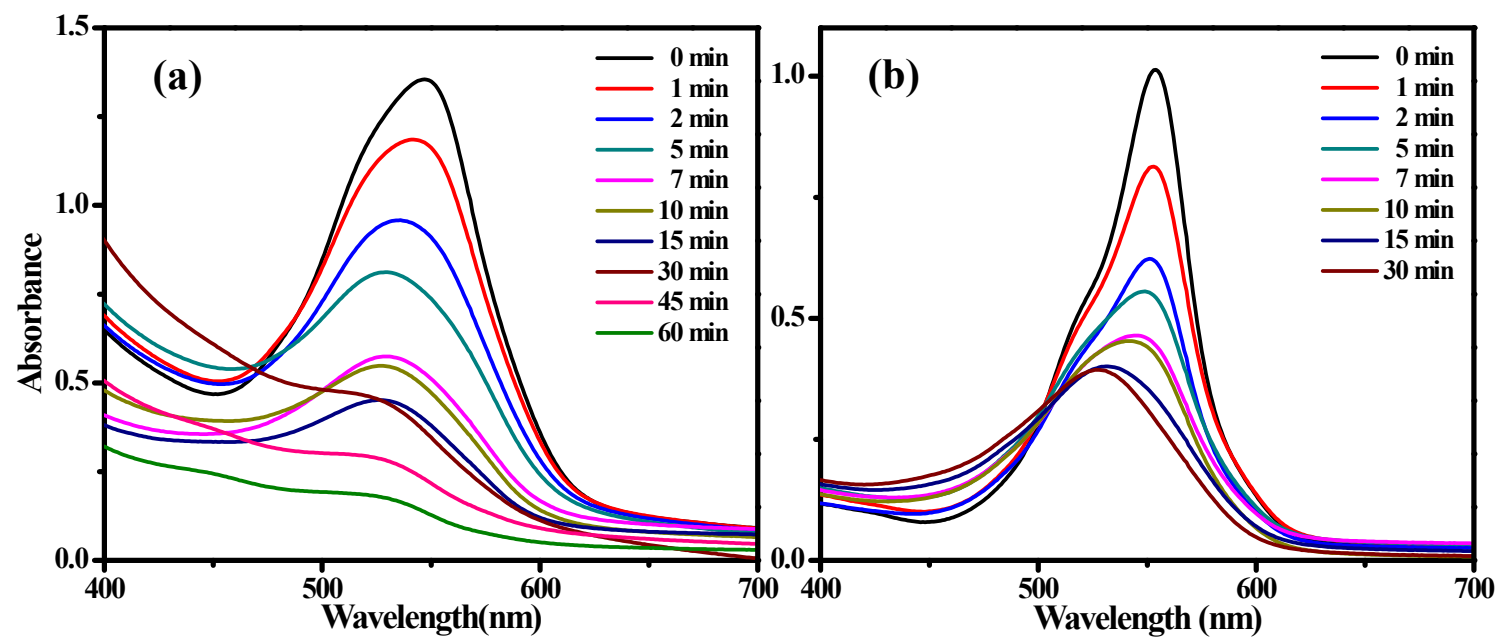

**Fig. S9.** The change observed in UV-Vis absorbance spectra in the presence of (a) W-1.5 and (b) W-2.05 under sunlight irradiation for different times.
